EDITORIAL

# *PLOS Neglected Tropical Diseases* 2016 Reviewer and Editorial Board Thank You

PLOS and the *PLOS Neglected Tropical Diseases* (*PLOS NTDs*) team would like to express our sincere gratitude to everyone who lent us their expertise as an editor, as a guest editor, or as a peer reviewer in 2016. We are fully dependent on the voluntary efforts of these experts to publish the journal for the academic community. Over the past year, *PLOS NTDs* relied on 405 editorial board members and guest editors to manage the 1,771 articles submitted to the journal, which were assessed by more than 2,500 reviewers. Their efforts enabled the publication of more than 870 rigorous, Open Access papers.

The names of our 2016 editors that handled submitted manuscripts appear in the Supporting Information as [S1 Editor List](#) and as [S1 Guest Editor List](#). Our reviewers appear in the Supporting Information as [S1 Reviewer List](#). We are grateful for their dedication, generosity, and support of Open Access science. Thank you all.

## Supporting information

**S1 Editor List. Alphabetical list of 2016 *PLOS NTDs* Editorial Board Members.**  
(PDF)

**S1 Guest Editor List. Alphabetical list of 2016 *PLOS NTDs* Guest Editors.**  
(PDF)

**S1 Reviewer List. Alphabetical list of 2016 *PLOS NTDs* peer reviewers.**  
(PDF)

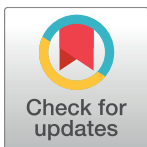

## OPEN ACCESS

**Citation:** (2017) *PLOS Neglected Tropical Diseases* 2016 Reviewer and Editorial Board Thank You. *PLoS Negl Trop Dis* 11(3): e0005469. <https://doi.org/10.1371/journal.pntd.0005469>

**Published:** March 20, 2017

**Copyright:** © 2017 The PLOS Neglected Tropical Diseases Staff. This is an open access article distributed under the terms of the [Creative Commons Attribution License](#), which permits unrestricted use, distribution, and reproduction in any medium, provided the original author and source are credited.

**Funding:** The author(s) received no specific funding for this work.

**Competing interests:** The authors have declared that no competing interests exist.

## References

1. (2016) *PLOS Neglected Tropical Diseases* 2015 Reviewer Thank You. *PLoS Negl Trop Dis* 10(2): e0004520. <https://doi.org/10.1371/journal.pntd.0004520>
2. (2015) *PLOS Neglected Tropical Diseases* 2014 Reviewer Thank You. *PLoS Negl Trop Dis* 9(2): e0003621. <https://doi.org/10.1371/journal.pntd.0003621>
